# Supplementary material for: Larval development in the Pacific oyster and the impacts of ocean acidification: Differential genetic effects in wild and domesticated stocks
Source: PubMed Central journal article supplement (PMC8477599; doi:10.1111/eva.13289), 2021-08-26

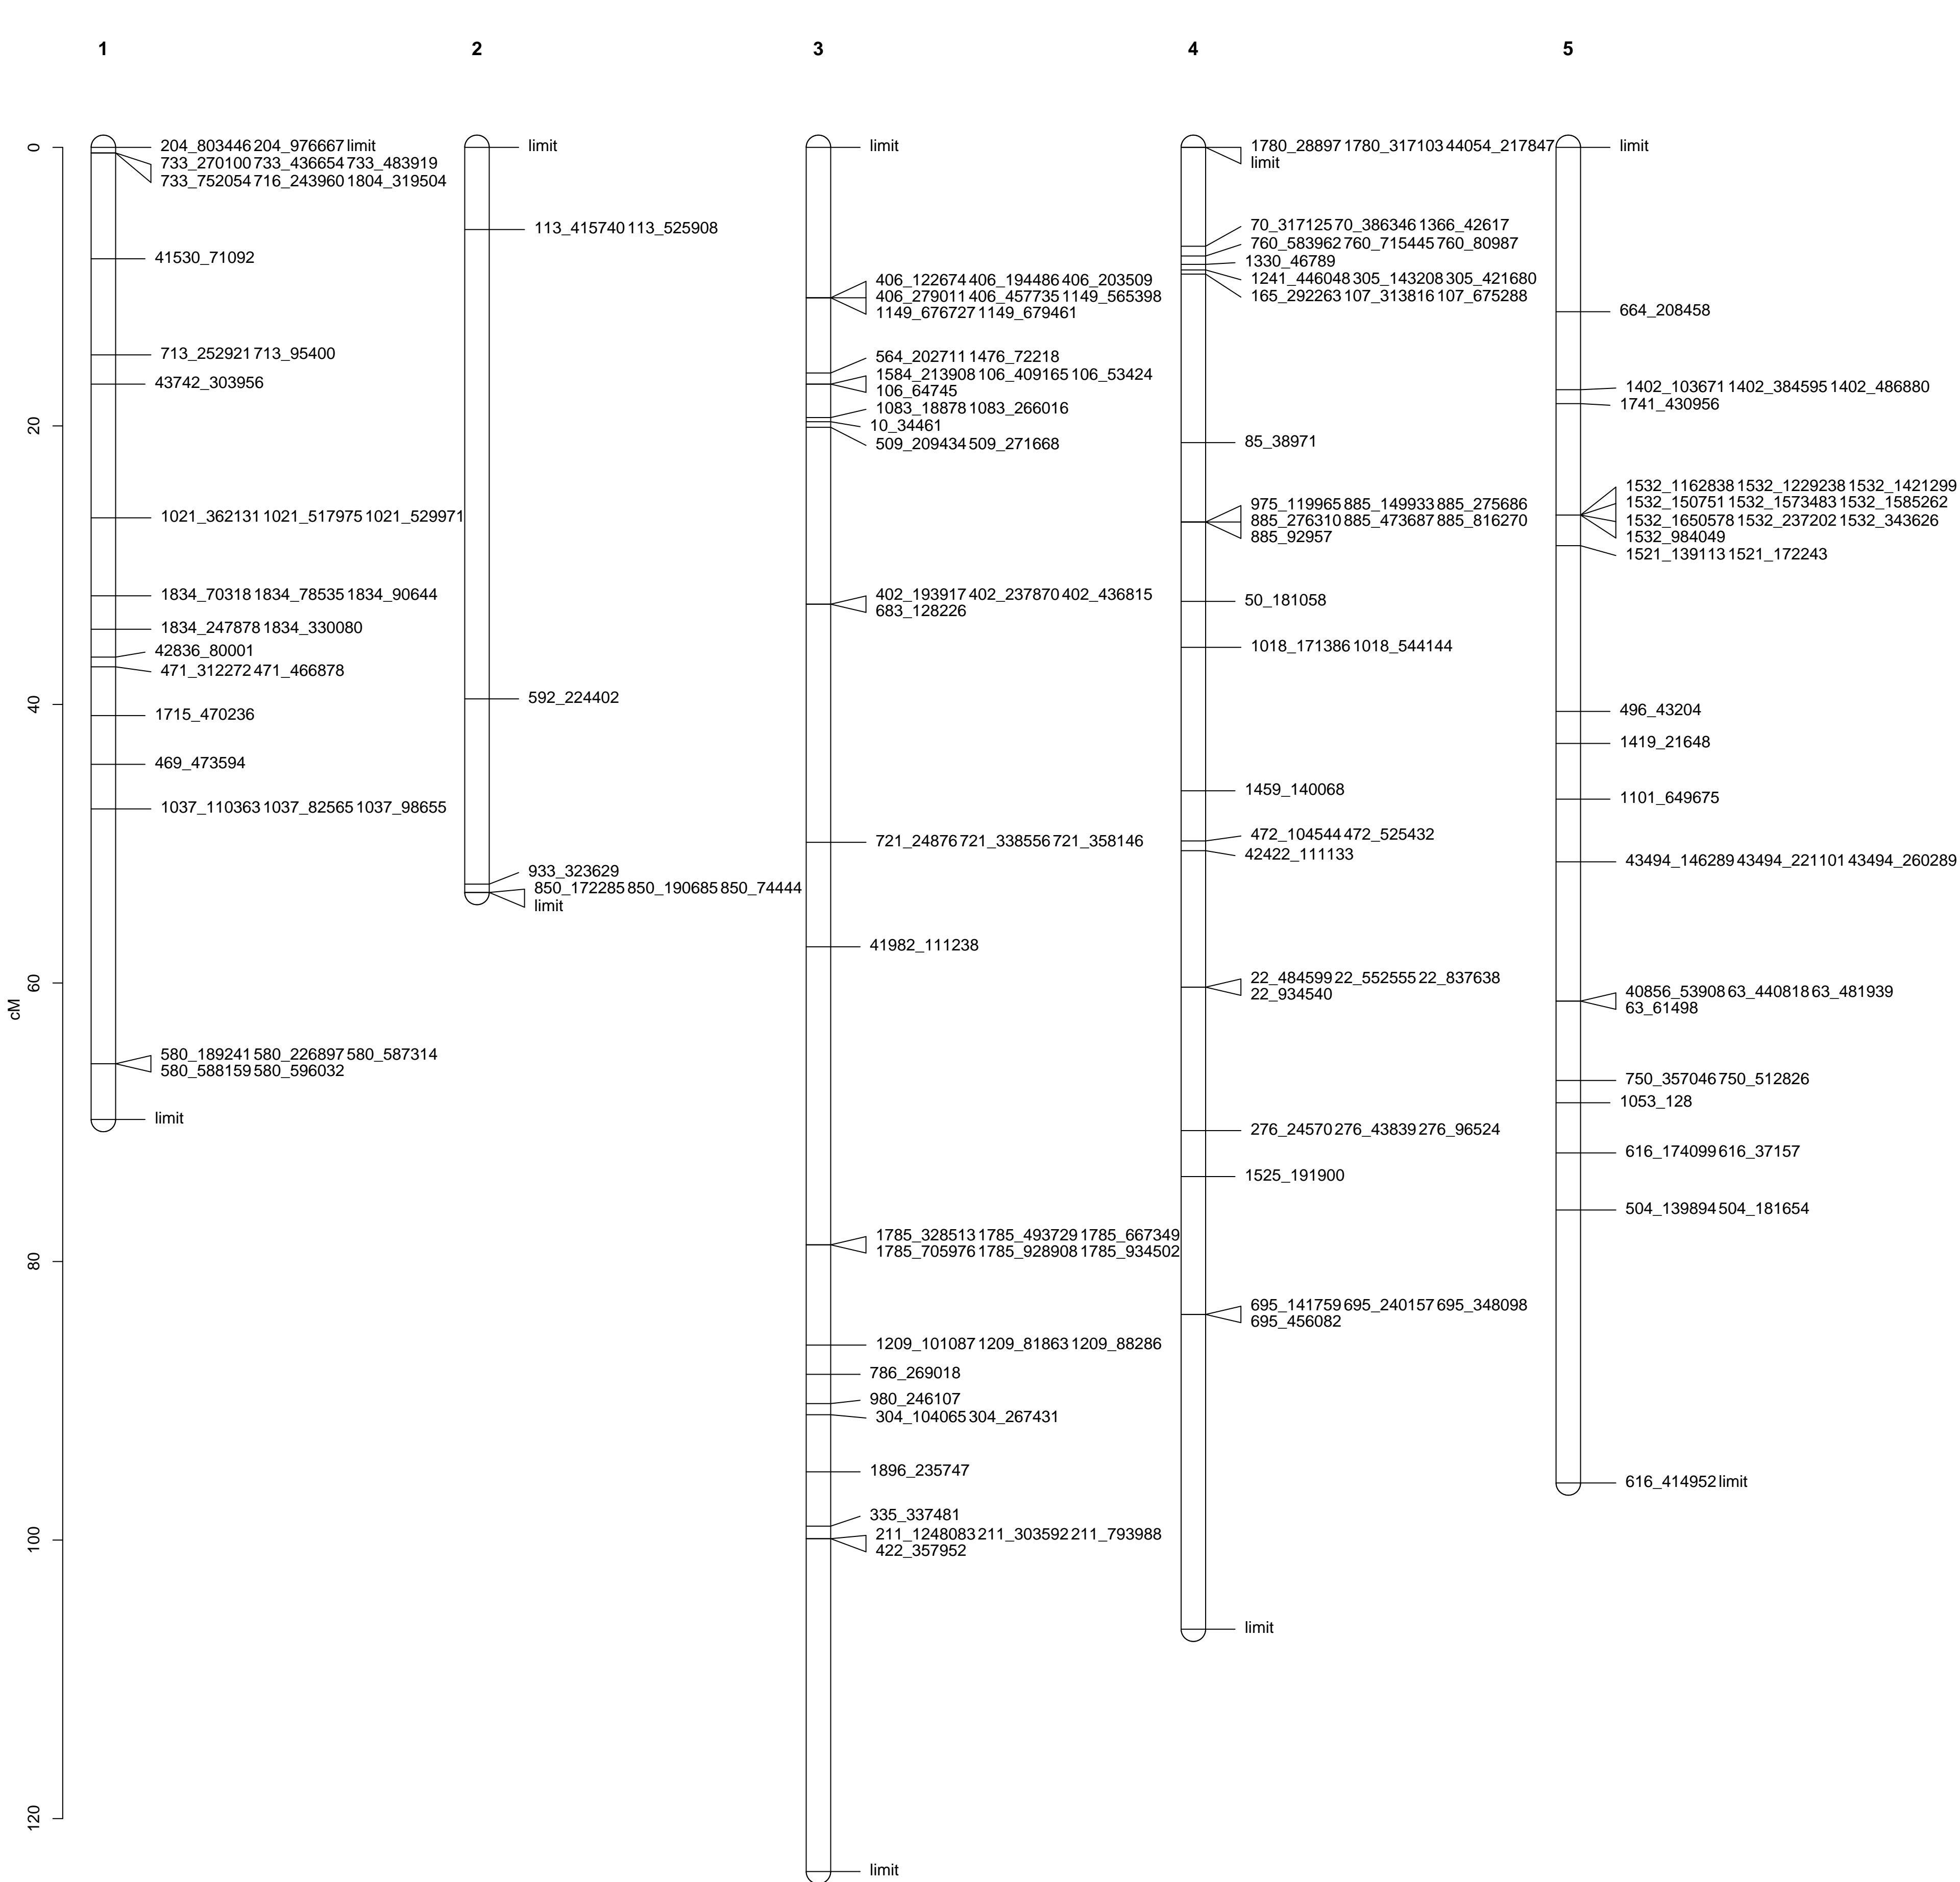

Supplement: EVA-14-2258-s001.pdf [file EVA-14-2258-s001.pdf]
